# Supplementary material for: Pulmonary Involvement in Recurrent Respiratory Papillomatosis: A Systematic Review
Source: MDPI journal article supplement (doi:10.3390/idr16020016), 2024-02-28
Supplement: s1 [file s1]

**S1. Table S1.** Summary of the main characteristic of the included studies.

| Ref. | First Author                 | Title                                                                                                                                            | Publication year | Type of study               | Mono/Multicenter Study | Country | Study period                         | Follow-up  |
|------|------------------------------|--------------------------------------------------------------------------------------------------------------------------------------------------|------------------|-----------------------------|------------------------|---------|--------------------------------------|------------|
| [24] | Sievers C, et al.            | Comprehensive multiomic characterization of human papillomavirus-driven recurrent respiratory papillomatosis reveals distinct molecular subtypes | 2021             | -                           | -                      | USA     | 12 months                            | -          |
| [25] | Yang Q, et al.               | Long-term Outcomes of Juvenile Onset Recurrent Respiratory Papillomatosis with Pulmonary Involvement                                             | 2021             | Retrospective-Observational | Monocenter             | China   | 29 years (January 1990-October 2019) | 10 years   |
| [34] | Karatayli-Ozgursoy S, et al. | Risk Factors for Dysplasia in Recurrent Respiratory Papillomatosis in an Adult and Pediatric Population                                          | 2016             | Retrospective               | Monocenter             | USA     | 8 years (July 2005-December 2013)    | -          |
| [26] | Omland T, et al.             | Recurrent respiratory papillomatosis: HPV genotypes and risk of high-grade laryngeal neoplasia                                                   | 2014             | Retrospective               | Multicenter            | Norway  | 22 years (1987-2009)                 | Until 2012 |
| [35] | Soldatski IL, et al.         | Tracheal, bronchial, and pulmonary papillomatosis in children                                                                                    | 2005             | Retrospective               | Monocenter             | Russia  | 15 years (1988-2003)                 | -          |
| [27] | Gerein V, et al.             | Incidence, age at onset, and potential reasons of malignant transformation in recurrent respiratory papillomatosis patients: 20 years experience | 2005             | Prospective                 | Multicenter            | Germany | 7 years (1983-1990)                  | Until 2003 |

|      |                         |                                                                                                                                                                                           |      |                          |            |           |                      |            |
|------|-------------------------|-------------------------------------------------------------------------------------------------------------------------------------------------------------------------------------------|------|--------------------------|------------|-----------|----------------------|------------|
| [28] | Wiatrak BJ, et al.      | Recurrent respiratory papillomatosis: a longitudinal study comparing severity associated with human papilloma viral types 6 and 11 and other risk factors in a large pediatric population | 2004 | Prospective-Longitudinal | Monocenter | USA       | 10 years             | -          |
| [29] | Gabbott M, et al.       | Human papillomavirus and host variables as predictors of clinical course in patients with juvenile-onset recurrent respiratory papillomatosis                                             | 1997 | Retrospective            | Monocenter | Australia | 15 years (1981-1996) | -          |
| [30] | Allen CT, et al.        | Safety and clinical activity of PD-L1 blockade in patients with aggressive recurrent respiratory papillomatosis                                                                           | 2019 | Interventional/phase II  | Monocenter | USA       | -                    | 18 years   |
| [31] | Zawadzka-Glos L, et al. | Lower airway papillomatosis in children                                                                                                                                                   | 2003 | Observational            | Monocenter | Poland    | 22 years (1980-2002) | 8-16 years |
| [32] | R. Rabah, et al.        | Human papillomavirus-11-associated recurrent respiratory papillomatosis is more aggressive than human papillomavirus-6-associated disease                                                 | 2001 | Retrospective            | Monocenter | USA       | 20 years (1979-1999) | -          |
